# Supplementary material
Source: MDPI journal article supplement (https://www.mdpi.com/2075-4701/13/7/1296)
Supplement: s1 [file s1]

*Supplementary*

# Microstructure and Phase Transition of $\text{Ag}_{50.5}\text{Cu}_{33.3}\text{Sn}_{16.2-x}\text{In}_x$ Alloys through Experimental Study and Thermodynamic Calculation

Qingsong Tong, Maohua Rong \* and Jiang Wang \*

School of Materials Science and Engineering & Guangxi Key Laboratory of Information Materials,  
Guilin University of Electronic Technology, Guilin 541004, China; 13635644432@163.com

\* Correspondence: rongmh124@guet.edu.cn (M.R.); waj124@guet.edu.cn (J.W.)

**Table S1** Thermodynamic parameters of the Ag-Cu-Sn-In quaternary system

| Phase  | Thermodynamic parameters                                                                                                              | Reference |
|--------|---------------------------------------------------------------------------------------------------------------------------------------|-----------|
| liquid | ${}^0L_{Ag,Cu}^{liq} = 16914.949 - 14.7721T + 1.54955T \ln T$ ; ${}^1L_{Ag,Cu}^{liq} = -1963.300 + 0.8623T$                           | [28]      |
|        | ${}^0L_{Ag,In}^{liq} = -26499.412 + 66.148718T - 8.6214682T \ln T$                                                                    | [29]      |
|        | ${}^1L_{Ag,In}^{liq} = -38058.4 + 143.60133T - 17.657918T \ln T$                                                                      | [29]      |
|        | ${}^2L_{Ag,In}^{liq} = -16572.628 + 121.0128T - 15.89588T \ln T$ ; ${}^3L_{Ag,In}^{liq} = 5791.2978$                                  | [29]      |
|        | ${}^0L_{Ag,Sn}^{liq} = -3177.49 - 10.16124T + 0.380505T \ln T$                                                                        | [30]      |
|        | ${}^1L_{Ag,Sn}^{liq} = -16782.28 + 2.06521T + 0.437477T \ln T$                                                                        | [30]      |
|        | ${}^2L_{Ag,Sn}^{liq} = 3190.34 - 107.09456T + 13.954838T \ln T$                                                                       | [30]      |
|        | ${}^0L_{Cu,In}^{liq} = -41564.8 + 238.616T - 29.827T \ln T$ ; ${}^1L_{Cu,In}^{liq} = -76057.8 + 371.306T - 44.994T \ln T$             | [31]      |
|        | ${}^2L_{Cu,In}^{liq} = -42076.5 + 192.395T - 23.281T \ln T$                                                                           | [31]      |
|        | ${}^0L_{Cu,Sn}^{liq} = -9002.8 - 5.8381T$ ; ${}^1L_{Cu,Sn}^{liq} = -20100.4 + 3.63666T$ ; ${}^2L_{Cu,Sn}^{liq} = -10528.40$           | [32]      |
|        | ${}^0L_{In,Sn}^{liq} = -711 - 1.6934T$ ; ${}^1L_{In,Sn}^{liq} = -64 - 1.3592T$                                                        | [33]      |
|        | ${}^0L_{Ag,Cu,Sn}^{liq} = -80000 + 27.98T$ ; ${}^1L_{Ag,Cu,Sn}^{liq} = -85233 + 29.44T$ ; ${}^2L_{Ag,Cu,Sn}^{liq} = -40000 + 26.56T$  | [12]      |
|        | ${}^0L_{Ag,Cu,In}^{liq} = -50066 + 24.15T$ ; ${}^1L_{Ag,Cu,In}^{liq} = -134807 + 94.27T$ ; ${}^2L_{Ag,Cu,In}^{liq} = 31076 - 167.55T$ | [34]      |
|        | ${}^0L_{Ag,In,Sn}^{liq} = 64697 - 8.82T$ ; ${}^1L_{Ag,In,Sn}^{liq} = 23474 - 22.792T$ ; ${}^2L_{Ag,In,Sn}^{liq} = 13374 - 27.171T$    | [34]      |
|        | ${}^0L_{Cu,In,Sn}^{liq} = 92284.1485 - 57.897T$ ; ${}^1L_{Cu,In,Sn}^{liq} = -17306.1096 + 20.828T$ ;                                  | [34]      |
|        | ${}^2L_{Cu,In,Sn}^{liq} = -1332.422 - 26.208T$                                                                                        | [34]      |
| Fcc    | ${}^0L_{Ag,Cu}^{Fcc} = 32580.365 - 7.4547T$ ; ${}^1L_{Ag,Cu}^{Fcc} = -10144.596 + 5.5617T$                                            | [28]      |
|        | ${}^0L_{Ag,In}^{Fcc} = -17978.868 + 10.39293T$ ; ${}^1L_{Ag,In}^{Fcc} = -32794.133$                                                   | [29]      |
|        | ${}^0L_{Ag,Sn}^{Fcc} = 745.45 + 11.498027T$ ; ${}^1L_{Ag,Sn}^{Fcc} = -36541.5$                                                        | [30]      |
|        | ${}^0L_{Cu,In}^{Fcc} = -6475.9 + 21.830T$ ; ${}^1L_{Cu,In}^{Fcc} = -29935.2 - 5.672T$ ; ${}^2L_{Cu,In}^{Fcc} = 47350.2 - 40.210T$     | [31]      |
|        | ${}^0L_{Cu,Sn}^{Fcc} = -10672 - 1.4837T$ ; ${}^1L_{Cu,Sn}^{Fcc} = -15331.3 + 6.9539T$                                                 | [32]      |
|        | ${}^0L_{In,Sn}^{Fcc} = 25000$                                                                                                         | [33]      |
|        | ${}^0L_{Ag,Cu,In}^{Fcc} = -273196 + 190T$ ; ${}^1L_{Ag,Cu,In}^{Fcc} = 85251.5$                                                        | [34]      |
|        | ${}^0L_{Ag,In,Sn}^{Fcc} = 105437 - 27.156T$ ; ${}^1L_{Ag,In,Sn}^{Fcc} = 173115$ ; ${}^2L_{Ag,In,Sn}^{Fcc} = 121030$                   | [34]      |
|        | ${}^0L_{Cu,In,Sn}^{Fcc} = -55000$ ; ${}^1L_{Cu,In,Sn}^{Fcc} = -55000$ ; ${}^2L_{Cu,In,Sn}^{Fcc} = -55000$                             | [34]      |
| Bcc    | ${}^0L_{Ag,In}^{Bcc} = 2858.3 - 14.059T$ ; ${}^1L_{Ag,In}^{Bcc} = -80876.7 + 17.445T$ ; ${}^2L_{Ag,In}^{Bcc} = 31125.1$               | [29]      |
|        | ${}^0L_{Cu,In}^{Bcc} = -20532.763 + 12.724T$ ; ${}^1L_{Cu,In}^{Bcc} = -13379.27 - 12.358T$                                            | [31]      |
|        | ${}^0L_{Cu,Sn}^{Bcc} = -32656.8 + 25.0158T$ ; ${}^1L_{Cu,Sn}^{Bcc} = -13862.5 - 32.0218T$                                             | [32]      |
|        | ${}^2L_{Cu,Sn}^{Bcc} = -4175.47 + 5.0083T$                                                                                            | [32]      |
|        | ${}^0L_{Ag,Cu}^{Bcc} = -12440.6 + 24.382T$                                                                                            | [34]      |
|        | ${}^0L_{In,Sn}^{Bcc} = 25000$                                                                                                         | [34]      |
|        | ${}^0L_{Ag,Cu,In}^{Bcc} = 313800 - 266.2T$ ; ${}^1L_{Ag,Cu,In}^{Bcc} = 210500 - 276.05T$ ; ${}^2L_{Ag,Cu,In}^{Bcc} = 1200$            | [34]      |

|                                           |                                                                                                                                                                                                                 |      |
|-------------------------------------------|-----------------------------------------------------------------------------------------------------------------------------------------------------------------------------------------------------------------|------|
|                                           | ${}^0L_{\text{Cu,In,Sn}}^{\text{Bcc}} = 18052.7; {}^1L_{\text{Cu,In,Sn}}^{\text{Bcc}} = -9000; {}^2L_{\text{Cu,In,Sn}}^{\text{Bcc}} = 25000$                                                                    | [34] |
|                                           | ${}^0L_{\text{Ag,In}}^{\text{Hcp}} = -15502.468 + 9.129T; {}^1L_{\text{Ag,In}}^{\text{Hcp}} = -60975.391 + 4.723T; {}^2L_{\text{Ag,In}}^{\text{Hcp}} = 31769.287$                                               | [29] |
|                                           | ${}^0L_{\text{Ag,Sn}}^{\text{Hcp}} = 1046.1 + 10.23693T; {}^1L_{\text{Ag,Sn}}^{\text{Hcp}} = -40505.5$                                                                                                          | [30] |
| Hcp                                       | ${}^0L_{\text{Ag,Cu}}^{\text{Hcp}} = 20573.1$                                                                                                                                                                   | [34] |
|                                           | ${}^0L_{\text{In,Sn}}^{\text{Hcp}} = 25700$                                                                                                                                                                     | [34] |
|                                           | ${}^0L_{\text{Ag,Cu,In}}^{\text{Hcp}} = -308146.1 + 334.359T$                                                                                                                                                   | [34] |
|                                           | ${}^0L_{\text{Ag,In,Sn}}^{\text{Hcp}} = 9456 - 10.641T; {}^1L_{\text{Ag,In,Sn}}^{\text{Hcp}} = 77280 + 1.308T; {}^2L_{\text{Ag,In,Sn}}^{\text{Hcp}} = 76616 - 29.97T$                                           | [34] |
| $\beta$ -InSn                             | ${}^0L_{\text{In,Sn}}^{\beta-\text{InSn}} = 35.7 - 4.561T$                                                                                                                                                      | [33] |
| $\gamma$ -InSn                            | ${}^0L_{\text{In,Sn}}^{\gamma-\text{InSn}} = -15715.5 + 19.3402T$                                                                                                                                               | [33] |
| Bct                                       | ${}^0L_{\text{In,Sn}}^{\text{Bct}} = -239 + 2.8509T$                                                                                                                                                            | [33] |
| Tetragonal                                | ${}^0L_{\text{In,Sn}}^{\text{Tetragonal}} = 718 - 1.495T; {}^1L_{\text{In,Sn}}^{\text{Tetragonal}} = -2217$                                                                                                     | [33] |
| AgIn <sub>2</sub>                         | ${}^0G_{\text{Ag,In}}^{\text{AgIn}_2} = -8059.1667 + 8.583T + 0.333{}^0G_{\text{Ag}}^{\text{Fcc}} + 0.667{}^0G_{\text{In}}^{\text{Tetragonal}}$                                                                 | [29] |
|                                           | ${}^0G_{\text{Cu,In}}^{\text{AgIn}_2} = 0.333{}^0G_{\text{Cu}}^{\text{Fcc}} + 0.667{}^0G_{\text{In}}^{\text{Tetragonal}}$                                                                                       | [29] |
|                                           | ${}^1G_{\text{Ag,Cu,In}}^{\text{AgIn}_2} = -9466.667$                                                                                                                                                           | [29] |
| Ag <sub>9</sub> In <sub>4</sub>           | ${}^0G_{\text{Ag,Ag,In,In}}^{\text{Ag}_9\text{In}_4} = -8200.208 - 0.48T + 0.692{}^0G_{\text{Ag}}^{\text{Fcc}} + 0.308{}^0G_{\text{In}}^{\text{Tetragonal}}$                                                    | [29] |
|                                           | ${}^0G_{\text{Ag,In,In,In}}^{\text{Ag}_9\text{In}_4} = 0.462{}^0G_{\text{Ag}}^{\text{Fcc}} + 0.538{}^0G_{\text{In}}^{\text{Tetragonal}}$                                                                        | [29] |
|                                           | ${}^0G_{\text{Ag,Cu,In,In}}^{\text{Ag}_9\text{In}_4} = -3150.854 + 3.578T + 0.462{}^0G_{\text{Ag}}^{\text{Fcc}} + 0.231{}^0G_{\text{Cu}}^{\text{Fcc}} + 0.307{}^0G_{\text{In}}^{\text{Tetragonal}}$             | [29] |
|                                           | ${}^0G_{\text{Ag,Ag,In,In,In}}^{\text{Ag}_9\text{In}_4} = -5300; {}^0G_{\text{Ag,Ag,Cu,In,In}}^{\text{Ag}_9\text{In}_4} = -8174.992$                                                                            | [29] |
| Ag <sub>3</sub> Sn                        | ${}^0G_{\text{Ag,Ag}}^{\text{Ag}_3\text{Sn}} = 4750 - 0.5T + {}^0G_{\text{Ag}}^{\text{Fcc}}$                                                                                                                    | [30] |
|                                           | ${}^0G_{\text{Ag,Sn}}^{\text{Ag}_3\text{Sn}} = -11085.3 + 110.01471T - 23.18T\ln T - 0.00359T^{-2} + 4389.5T^{-1}$                                                                                              | [30] |
| $\gamma$ -CuIn                            | ${}^0G_{\text{Cu,Cu,In}}^{\gamma-\text{CuIn}} = -2201.8 - 3.443T + 0.769{}^0G_{\text{Cu}}^{\text{Fcc}} + 0.231{}^0G_{\text{In}}^{\text{Tetragonal}}$                                                            | [31] |
|                                           | ${}^0G_{\text{Cu,In,In}}^{\gamma-\text{CuIn}} = -7131.6 + 0.112T + 0.654{}^0G_{\text{Cu}}^{\text{Fcc}} + 0.346{}^0G_{\text{In}}^{\text{Tetragonal}}$                                                            | [31] |
|                                           | ${}^0G_{\text{Ag,Ag,In}}^{\gamma-\text{CuIn}} = -1620.0692 - 6.5712T + 0.769{}^0G_{\text{Ag}}^{\text{Fcc}} + 0.231{}^0G_{\text{In}}^{\text{Tetragonal}}$                                                        | [34] |
|                                           | ${}^0G_{\text{Ag,In,In}}^{\gamma-\text{CuIn}} = 200 + 0.654{}^0G_{\text{Ag}}^{\text{Fcc}} + 0.346{}^0G_{\text{In}}^{\text{Tetragonal}}; {}^0G_{\text{Ag,Ag,In,In}}^{\gamma-\text{CuIn}} = -8456.9907 + 9.1312T$ | [34] |
|                                           | ${}^0G_{\text{Ag,Cu,Cu,In}}^{\gamma-\text{CuIn}} = -24700 - 25T$                                                                                                                                                | [34] |
| $\delta$ -Cu <sub>7</sub> In <sub>3</sub> | ${}^0G_{\text{Cu,In}}^{\delta-\text{Cu}_7\text{In}_3} = -7991.3 + 1.170T + 0.7{}^0G_{\text{Cu}}^{\text{Fcc}} + 0.3{}^0G_{\text{In}}^{\text{Tetragonal}}$                                                        | [31] |
|                                           | ${}^0G_{\text{Ag,In}}^{\delta-\text{Cu}_7\text{In}_3} = 0.7{}^0G_{\text{Cu}}^{\text{Fcc}} + 0.3{}^0G_{\text{In}}^{\text{Tetragonal}}$                                                                           | [29] |
|                                           | ${}^1G_{\text{Ag,Cu,In}}^{\delta-\text{Cu}_7\text{In}_3} = 53045.9 - 93.729T$                                                                                                                                   | [29] |
| $\eta$ -LT                                | ${}^0G_{\text{Cu,In}}^{\eta-\text{LT}} = -8173.8 + 1.380T + 0.64{}^0G_{\text{Cu}}^{\text{Fcc}} + 0.36{}^0G_{\text{In}}^{\text{Tetragonal}}$                                                                     | [31] |

|                                               |                                                                                                                                                                                                                          |      |
|-----------------------------------------------|--------------------------------------------------------------------------------------------------------------------------------------------------------------------------------------------------------------------------|------|
| Cu <sub>11</sub> In <sub>9</sub>              | ${}^0G_{\text{Cu:In}}^{\text{Cu}_{11}\text{In}_9} = -7525.6 + 1.703T + 0.55{}^0G_{\text{Ag}}^{\text{Fcc}} + 0.45{}^0G_{\text{In}}^{\text{Tetragonal}}$                                                                   | [31] |
|                                               | ${}^0G_{\text{Ag:In}}^{\text{Cu}_{11}\text{In}_9} = 0.55{}^0G_{\text{Ag}}^{\text{Fcc}} + 0.45{}^0G_{\text{In}}^{\text{Tetragonal}}$                                                                                      | [29] |
|                                               | ${}^0G_{\text{Ag,Cu:In}}^{\text{Cu}_{11}\text{In}_9} = 10800 - 12T$                                                                                                                                                      | [34] |
| Cu <sub>3</sub> Sn                            | ${}^0G_{\text{Cu:Sn}}^{\text{Cu}_3\text{Sn}} = -8194.2 - 0.2043T + 0.75{}^0G_{\text{Cu}}^{\text{Fcc}} + 0.25{}^0G_{\text{Sn}}^{\text{Bct}}$                                                                              | [32] |
|                                               | ${}^0G_{\text{Cu:In}}^{\text{Cu}_3\text{Sn}} = -7200 - 4T + 0.75{}^0G_{\text{Cu}}^{\text{Fcc}} + 0.25{}^0G_{\text{In}}^{\text{Tetragonal}}$                                                                              | [34] |
|                                               | ${}^0G_{\text{Cu:In,Sn}}^{\text{Cu}_3\text{Sn}} = -5800 + 3T$                                                                                                                                                            | [34] |
| Cu <sub>10</sub> Sn <sub>3</sub>              | ${}^0G_{\text{Cu:Sn}}^{\text{Cu}_{10}\text{Sn}_3} = -6655.1 - 1.485T + 0.769{}^0G_{\text{Cu}}^{\text{Fcc}} + 0.231{}^0G_{\text{Sn}}^{\text{Bct}}$                                                                        | [32] |
| Cu <sub>41</sub> Sn <sub>11</sub>             | ${}^0G_{\text{Cu:Sn}}^{\text{Cu}_{41}\text{Sn}_{11}} = -6323.5 - 1.2808T + 0.788{}^0G_{\text{Cu}}^{\text{Fcc}} + 0.212{}^0G_{\text{Sn}}^{\text{Bct}}$                                                                    | [32] |
|                                               | ${}^0G_{\text{Cu:In}}^{\text{Cu}_{41}\text{Sn}_{11}} = -5350 + 1.5T + 0.788{}^0G_{\text{Cu}}^{\text{Fcc}} + 0.212{}^0G_{\text{In}}^{\text{Tetragonal}}$                                                                  | [34] |
|                                               | ${}^0G_{\text{Cu:In,Sn}}^{\text{Cu}_{41}\text{Sn}_{11}} = -13000 + 14.77T$                                                                                                                                               | [34] |
| Cu <sub>6</sub> Sn <sub>5</sub> -l            | ${}^0G_{\text{Cu,Sn}}^{\text{Cu}_6\text{Sn}_5\text{-l}} = -7129.7 + 0.4059T + 0.545{}^0G_{\text{Cu}}^{\text{Fcc}} + 0.455{}^0G_{\text{Sn}}^{\text{Bct}}$                                                                 | [32] |
| Cu <sub>6</sub> Sn <sub>5</sub> -h            | ${}^0G_{\text{Cu:Cu:In}}^{\text{Cu}_6\text{Sn}_5\text{-h}} = -6301.5 - 0.940T + 0.667{}^0G_{\text{Cu}}^{\text{Fcc}} + 0.333{}^0G_{\text{In}}^{\text{Tetragonal}}$                                                        | [31] |
|                                               | ${}^0G_{\text{Cu:Cu:Sn}}^{\text{Cu}_6\text{Sn}_5\text{-h}} = 3200 + 2T + 0.667{}^0G_{\text{Cu}}^{\text{Fcc}} + 0.333{}^0G_{\text{Sn}}^{\text{Bct}}$                                                                      | [32] |
|                                               | ${}^0G_{\text{Cu:In:In}}^{\text{Cu}_6\text{Sn}_5\text{-h}} = -156.7 - 7.030T + 0.545{}^0G_{\text{Cu}}^{\text{Fcc}} + 0.455{}^0G_{\text{In}}^{\text{Tetragonal}}$                                                         | [32] |
|                                               | ${}^0G_{\text{Cu:In:Sn}}^{\text{Cu}_6\text{Sn}_5\text{-h}} = -2492 + 4T + 0.545{}^0G_{\text{Cu}}^{\text{Fcc}} + 0.122{}^0G_{\text{In}}^{\text{Tetragonal}} + 0.333{}^0G_{\text{Sn}}^{\text{Bct}}$                        | [34] |
|                                               | ${}^0G_{\text{Cu:Sn:In}}^{\text{Cu}_6\text{Sn}_5\text{-h}} = 16000 + 0.545{}^0G_{\text{Cu}}^{\text{Fcc}} + 0.122{}^0G_{\text{Sn}}^{\text{Bct}} + 0.333{}^0G_{\text{In}}^{\text{Tetragonal}}$                             | [34] |
|                                               | ${}^0G_{\text{Cu:Sn:Sn}}^{\text{Cu}_6\text{Sn}_5\text{-h}} = -6869.5 - 0.1589T + 0.545{}^0G_{\text{Cu}}^{\text{Fcc}} + 0.455{}^0G_{\text{Sn}}^{\text{Bct}}$                                                              | [32] |
|                                               | ${}^0G_{\text{Cu:Cu,In:In}}^{\text{Cu}_6\text{Sn}_5\text{-h}} = -14526.5 + 18.020T$                                                                                                                                      | [31] |
|                                               | ${}^0G_{\text{Cu:Cu,In:Sn}}^{\text{Cu}_6\text{Sn}_5\text{-h}} = -14526.546 + 18.020T$ ; ${}^0G_{\text{Cu:Cu,Sn:In}}^{\text{Cu}_6\text{Sn}_5\text{-h}} = -37093.16 + 18.520T$                                             | [34] |
|                                               | ${}^0G_{\text{Cu:Cu,Sn:Sn}}^{\text{Cu}_6\text{Sn}_5\text{-h}} = -8300$ ; ${}^0G_{\text{Cu:In,Sn:In}}^{\text{Cu}_6\text{Sn}_5\text{-h}} = -8300$ ; ${}^0G_{\text{Cu:In,Sn:Sn}}^{\text{Cu}_6\text{Sn}_5\text{-h}} = -8300$ | [34] |
|                                               | ${}^0G_{\text{Cu:Cu:In,Sn}}^{\text{Cu}_6\text{Sn}_5\text{-h}} = -19650.8 - 0.4T$ ; ${}^0G_{\text{Cu:In:In,Sn}}^{\text{Cu}_6\text{Sn}_5\text{-h}} = -44570.8 + 39.6T$                                                     | [34] |
|                                               | ${}^0G_{\text{Cu:Sn:In,Sn}}^{\text{Cu}_6\text{Sn}_5\text{-h}} = -30000 + T$                                                                                                                                              | [34] |
|                                               | ${}^0G_{\text{Ag:Cu:In}}^{\text{Cu}_6\text{Sn}_5\text{-h}} = 200 + 0.545{}^0G_{\text{Ag}}^{\text{Fcc}} + 0.122{}^0G_{\text{Cu}}^{\text{Fcc}} + 0.333{}^0G_{\text{In}}^{\text{Tetragonal}}$                               | [34] |
|                                               | ${}^0G_{\text{Ag:In:In}}^{\text{Cu}_6\text{Sn}_5\text{-h}} = 200 + 0.545{}^0G_{\text{Ag}}^{\text{Fcc}} + 0.455{}^0G_{\text{In}}^{\text{Tetragonal}}$                                                                     | [34] |
|                                               | ${}^0G_{\text{Cu:Cu,In:In}}^{\text{Cu}_6\text{Sn}_5\text{-h}} = -14526.5 + 18.020T$                                                                                                                                      | [31] |
|                                               | ${}^0G_{\text{Cu:Ag,Cu:In}}^{\text{Cu}_6\text{Sn}_5\text{-h}} = -1000$ ; ${}^0G_{\text{Ag,Cu:Cu:In}}^{\text{Cu}_6\text{Sn}_5\text{-h}} = -2000$ ; ${}^0G_{\text{Ag,Cu:In:In}}^{\text{Cu}_6\text{Sn}_5\text{-h}} = 2000$  | [34] |
| $\tau_1$ -Cu <sub>11</sub> In <sub>2</sub> Sn | ${}^0G_{\text{Cu:In}}^{\text{Cu}_{11}\text{In}_2\text{Sn}} = -5250 + 0.77{}^0G_{\text{Cu}}^{\text{Fcc}} + 0.23{}^0G_{\text{In}}^{\text{Tetragonal}}$                                                                     | [34] |
|                                               | ${}^0G_{\text{Cu:Sn}}^{\text{Cu}_{11}\text{In}_2\text{Sn}} = -7000 + T + 0.77{}^0G_{\text{Cu}}^{\text{Fcc}} + 0.23{}^0G_{\text{Sn}}^{\text{Bct}}$                                                                        | [34] |
|                                               | ${}^0G_{\text{Cu:In,Sn}}^{\text{Cu}_{11}\text{In}_2\text{Sn}} = -4800$                                                                                                                                                   | [34] |
| $\tau_2$ -Cu <sub>2</sub> In <sub>3</sub> Sn  | ${}^0G_{\text{Cu:In:Sn}}^{\text{Cu}_2\text{In}_3\text{Sn}} = -9235 + 5T + 0.333{}^0G_{\text{Cu}}^{\text{Fcc}} + 0.5{}^0G_{\text{In}}^{\text{Tetragonal}} + 0.167{}^0G_{\text{Sn}}^{\text{Bct}}$                          | [34] |
